# Supplementary material for: Mold contamination in a controlled hospital environment: a 3-year surveillance in southern Italy
Source: PubMed Central journal article supplement (PMC4236478; doi:10.1186/s12879-014-0595-z), 2014-11-15

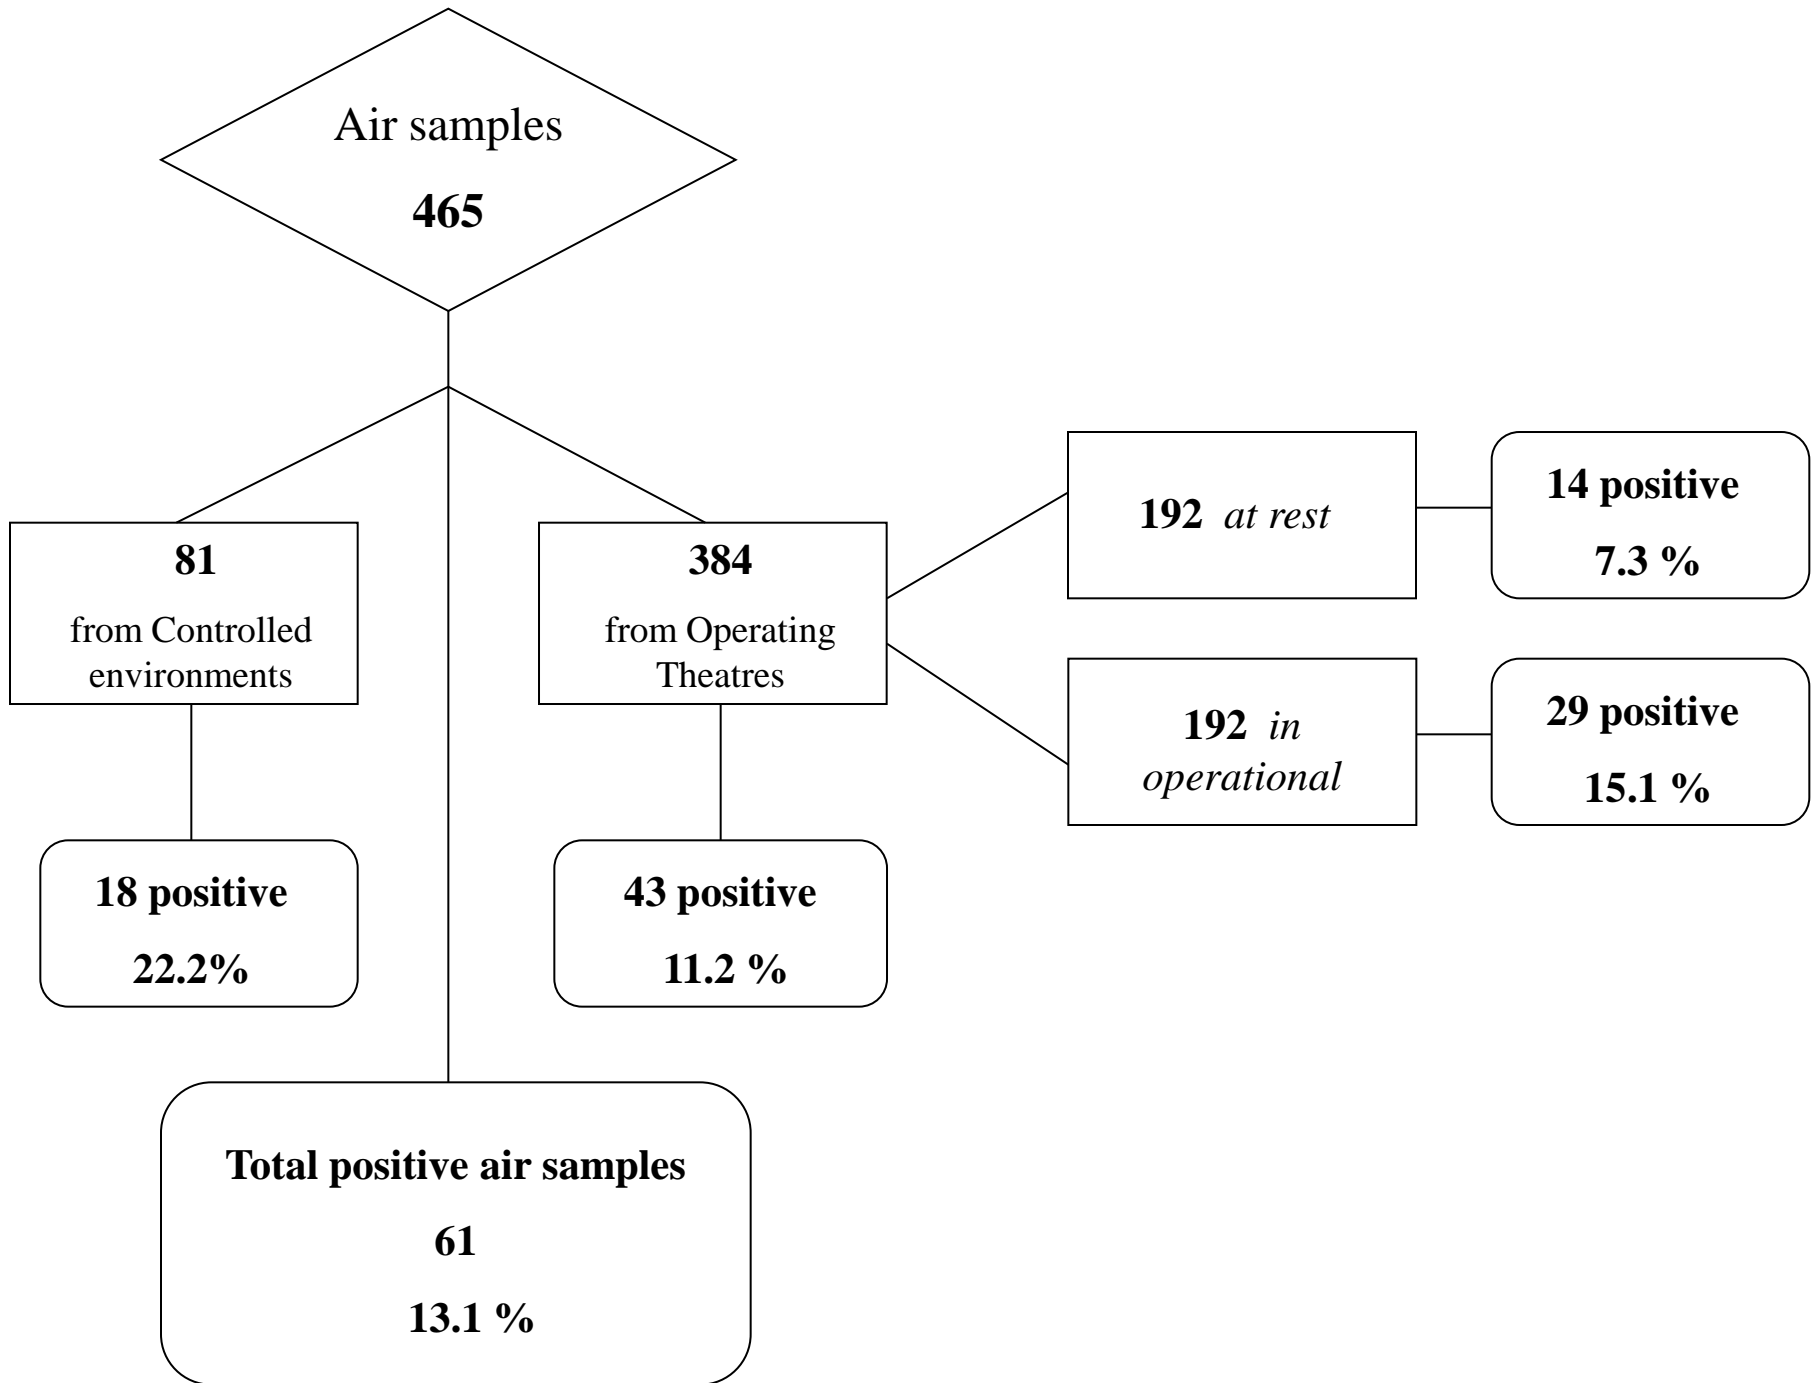

Supplement: 12879_2014_595_MOESM2_ESM.pdf [file 12879_2014_595_MOESM2_ESM.pdf]
